# ESMO Scientific & Educational Conference 2005, Officers and Organization

## President of ESEC

Paris A. Kosmidis, Greece

## ESEC Working Party Chairperson

Dirk Schrijvers, Belgium

## 4<sup>th</sup> ESMO Patient Seminar Working Group Chairperson

Gyoergy Bodoky, Hungary

---

General coordination and information, scientific program, abstracts and registration

### ESMO Congress Secretariat

Via La Santa 7  
6962 Viganello-Lugano Switzerland  
Phone +41 (0)91 973 1919  
Fax +41 (0)91 973 1918  
E-mail: congress@esmo.org  
URL www.esmo.org

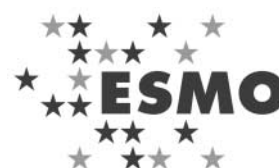

Sponsorship

### ESMO Head Office

Via La Santa 7  
6962 Viganello-Lugano Switzerland  
Phone +41 (0)91 973 1904  
Fax +41 (0)91 973 1905  
E-mail: marketing@esmo.org  
URL www.esmo.org

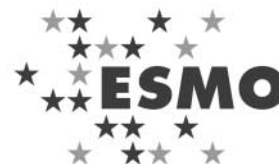

Hotel accommodation, optional tours, airport transfers

### Mondial Congress

Mondial Ges.m.b.H & Co.KG  
Fulmangasse 4  
1040 Vienna  
Austria  
Phone +43 588 040  
Fax +43 586 9185  
E-mail: esmo@mondial.at  
URL www.mondial.at

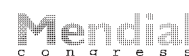

Exhibition management

MAW Medizinische Ausstellungs- u.  
Werbegesellschaft  
International Exhibitions and Advertising  
Freyung 6  
1010 Vienna  
Austria  
Phone +33 4 9392 8163  
Fax +33 4 9392 8338  
E-mail: maw@media.co.at

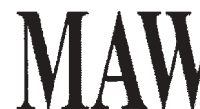

Source: http://annonc.oxfordjournals.org/cgi/reprint/16/suppl_2/ii11.pdf
